# Supplementary material
Source: PubMed Central journal article supplement (PMC6462517)
Supplement: supp_RA119.007410_142942_1_supp_286113_pmvwrg.pdf [file supp_RA119.007410_142942_1_supp_286113_pmvwrg.pdf]

# Importance of tRNA anticodon loop modification and a conserved, noncanonical anticodon stem pairing in tRNA<sup>Pro</sup><sub>CGG</sub> for decoding

## SUPPORTING INFORMATION

Ha An Nguyen<sup>1,2</sup>, Eric D. Hoffer<sup>1</sup>, and Christine M. Dunham<sup>1,2\*</sup>

<sup>1</sup>Department of Biochemistry, Emory University School of Medicine;

<sup>2</sup>Department of Chemistry, Emory University, Atlanta, GA 30322.

\*To whom correspondence should be addressed: Christine M. Dunham (Tel: 1-404-712-1756; Fax: 1-404- 727-2738; E-mail: [christine.m.dunham@emory.edu](mailto:christine.m.dunham@emory.edu))

*Running title: Anticodon stem-loop elements affect tRNA<sup>Pro</sup><sub>CGG</sub> decoding*

**Keywords:** translation, ribosome, transfer RNAs, RNA modification, messenger RNA, structural biology, decoding, mRNA frame maintenance

## SUPPLEMENTARY INFORMATION

**Table S1. Sequences of RNA used in this study.**

Insertions are bolded, the anticodon is underlined, and the N1 methylation at position 37 is noted as m<sup>1</sup>G for ASLs.

|                                                |                                                              |
|------------------------------------------------|--------------------------------------------------------------|
| ASL <sup>SufA6</sup>                           | GCU CGU <u>UCG</u> <u>G(m<sup>1</sup>G)</u> <b>G</b> ACG AGC |
| ASL <sup>SufA6</sup> Δm <sup>1</sup> G37       | GCU CGU <u>UCG</u> <u>GGG</u> ACG AGC                        |
| ASL <sup>SufA6</sup> A37.5                     | GCU CGU <u>UCG</u> <u>G(m<sup>1</sup>G)</u> <b>A</b> ACG AGC |
| ASL <sup>SufA6</sup> A37.5 Δm <sup>1</sup> G37 | GCU CGU <u>UCG</u> <u>GGA</u> ACG AGC                        |
| ASL <sup>Pro</sup>                             | GCU CGU <u>UCG</u> <u>G(m<sup>1</sup>G)</u> <b>A</b> CGA GC  |
| ASL <sup>Pro</sup> Δm <sup>1</sup> G37         | GCU CGU <u>UCG</u> <u>GGA</u> CGA GC                         |
| mRNA_Asite_CCG                                 | GGC AAG GAG GUA AAA AUG CCG UAC CA                           |
| mRNA_Asite_CCCU                                | GGC AAG GAG GUA AAA AUG CCCU ACCA                            |

**Table S2.  $K_d$  and  $B_{max}$  values (best fit  $\pm$  SE) for ASL<sup>Pro</sup>, ASL<sup>SufA6</sup>, and ASL<sup>SufA6</sup> A37.5 as determined by filter binding experiments at equilibrium.**

Binding constants were obtained by fitting the data from 6 replicates to a one site specific binding model using GraphPad Prism.

|                                            | mRNA            |                 |               |                   |
|--------------------------------------------|-----------------|-----------------|---------------|-------------------|
|                                            | CCG             |                 | CCCU          |                   |
|                                            | $K_d$ (nM)      | $B_{max}$       | $K_d$ (nM)    | $B_{max}$         |
| ASL <sup>Pro</sup>                         | 284 $\pm$ 27    | 0.69 $\pm$ 0.03 | 351 $\pm$ 79  | 0.20 $\pm$ 0.02   |
| ASL <sup>Pro</sup> $\Delta m^1G37$         | 1795 $\pm$ 475  | 0.42 $\pm$ 0.08 | 274 $\pm$ 46  | 0.18 $\pm$ 0.01   |
| ASL <sup>SufA6</sup>                       | 781 $\pm$ 333   | 0.25 $\pm$ 0.06 | 767 $\pm$ 173 | 0.10 $\pm$ 0.01   |
| ASL <sup>SufA6</sup> $\Delta m^1G37$       | 497 $\pm$ 187   | 0.15 $\pm$ 0.03 | 791 $\pm$ 180 | 0.51 $\pm$ 0.06   |
| ASL <sup>SufA6</sup> A37.5 $\Delta m^1G37$ | 4558 $\pm$ 4067 | 0.27 $\pm$ 0.21 | 212 $\pm$ 9   | 0.81 $\pm$ 0.01   |
| ASL <sup>SufA6</sup> A37.5                 | 1084 $\pm$ 188  | 0.19 $\pm$ 0.02 | 444 $\pm$ 98  | 0.055 $\pm$ 0.006 |

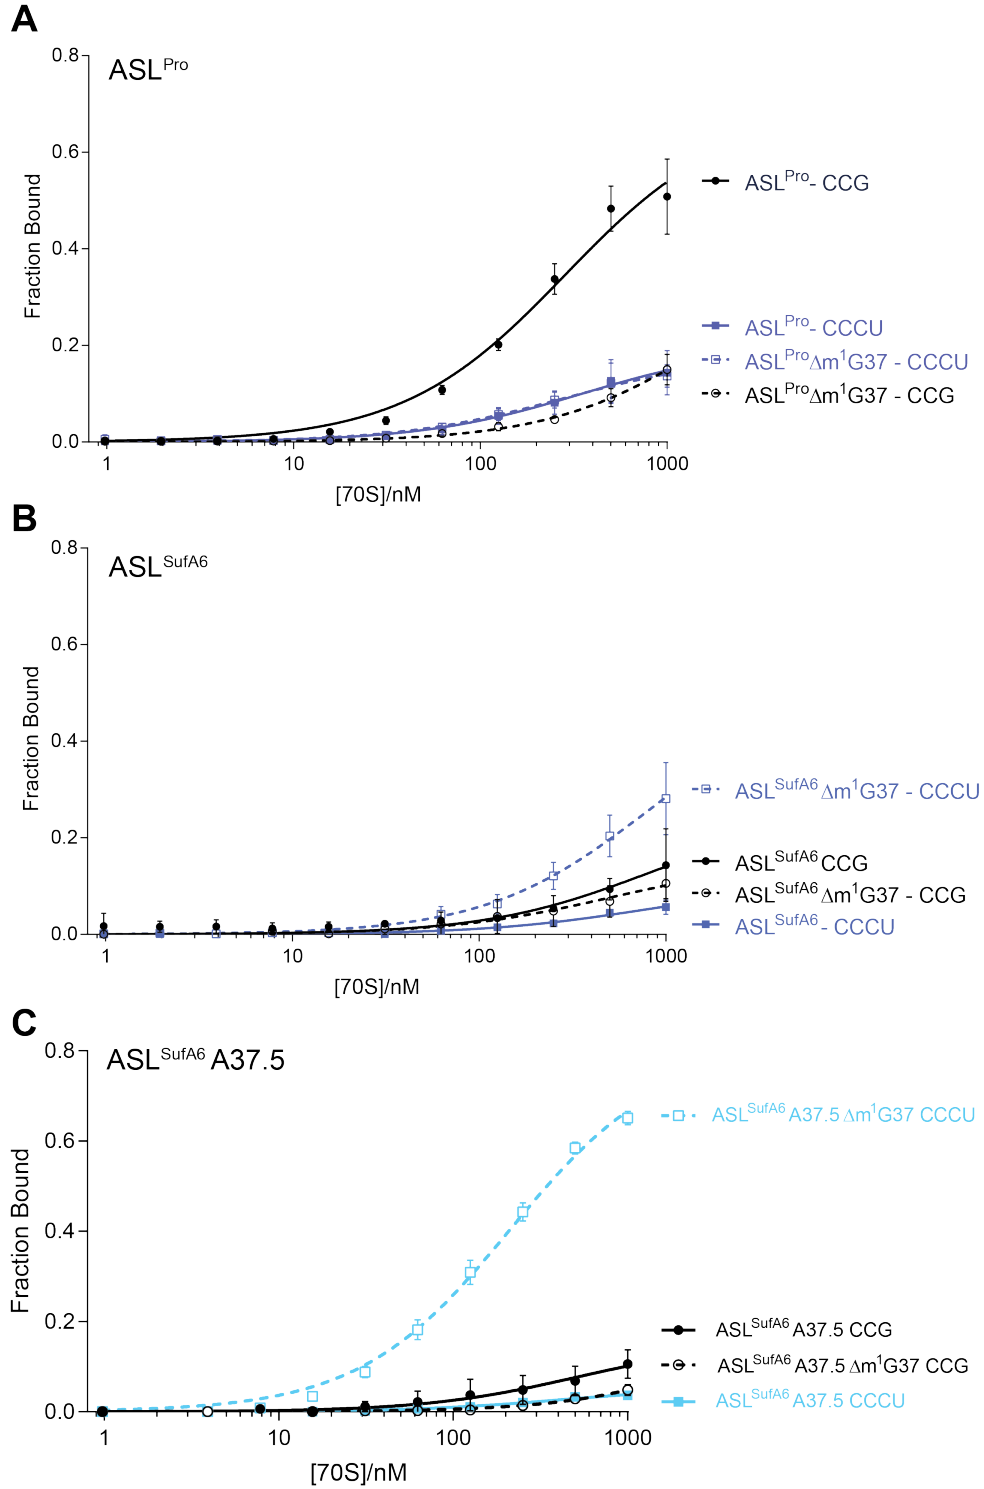

**Figure S1. Equilibrium binding curves ASL<sup>Pro</sup>, ASL<sup>SufA6</sup>, and ASL<sup>SufA6</sup> A37.5.**

Binding constants were obtained by fitting the data from 6 replicates to a one site specific binding model using GraphPad Prism.

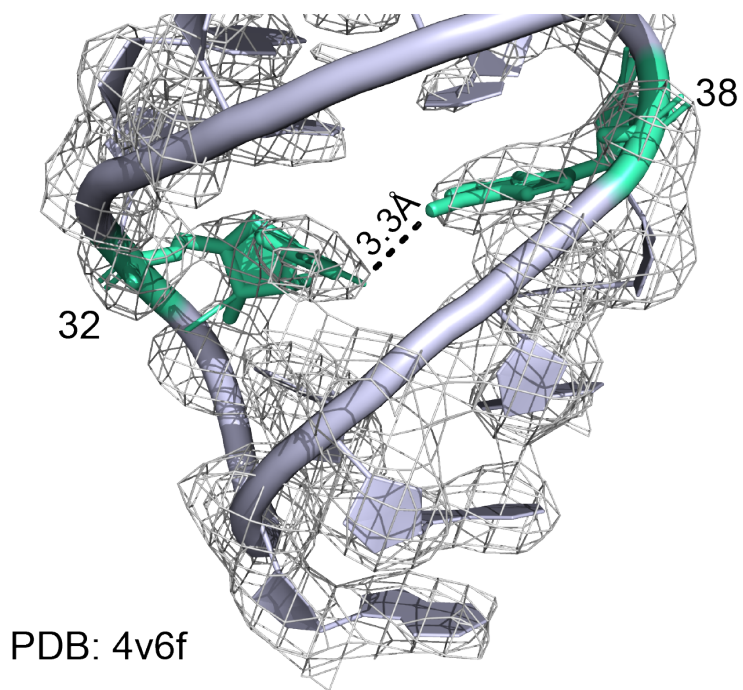

**Figure S2. The 32-38 pairing in tRNA<sup>Phe</sup> shows a conserved hydrogen bond (PDB code 4V6F; (1) ) similar to that of modified tRNA<sup>Pro</sup> binding to a cognate codon.**  
2F<sub>o</sub>-F<sub>c</sub> electron density map contoured at 1.5σ is shown in gray.

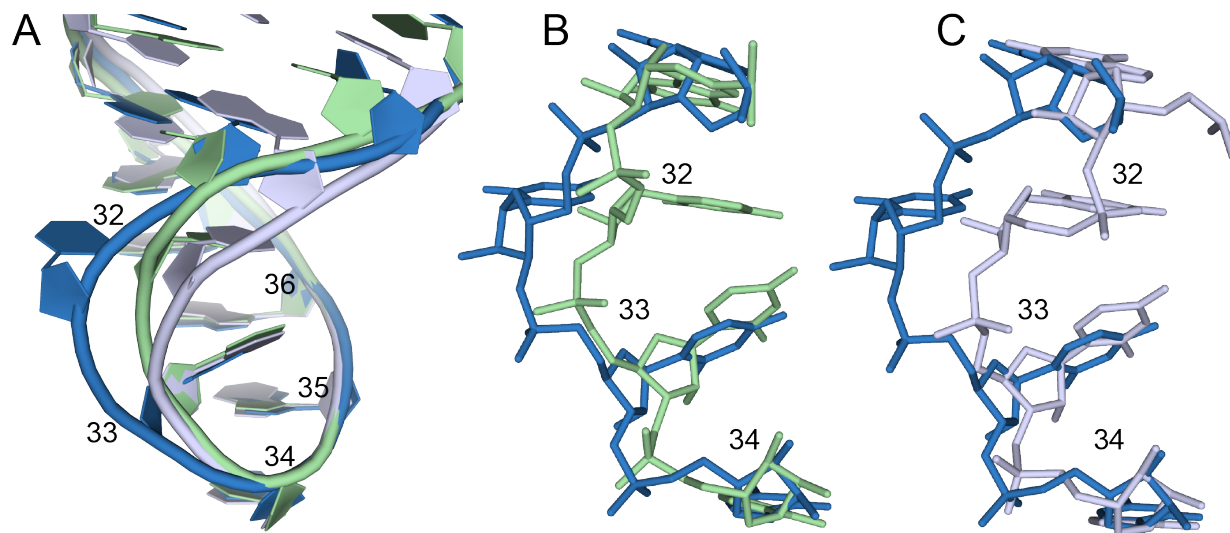

**6NDK:** ASL<sup>SufA6</sup> A37.5 Δm<sup>1</sup>G37 • A-site CCC-U  
**4LT8:** ASL<sup>Pro</sup> • A-site CCG  
**4L47:** ASL<sup>SufA6</sup> • A-site CCC-U

**Figure S3. The phosphate backbone of the ASL<sup>SufA6</sup> is widened in the case of the A37.5 insertion.**  
*A*, Overlay of ASL<sup>SufA6</sup> A37.5 Δm<sup>1</sup>G37 bound to CCC-U codon (blue, PDB code 6NDK;(2)), ASL<sup>Pro</sup> bound to CCG (green, PDB code 4LT8; (2)), and ASL<sup>SufA6</sup> bound to CCC-U (gray, PDB code 4L47; (2)) showing the reordering of the ASL on the opposite side of the insertion.  
*B-C*, ASL<sup>SufA6</sup> A37.5 Δm<sup>1</sup>G37 bound to A-site CCC-U (blue) codon adopts a conformation more similar to ASL<sup>Pro</sup> on CCG (green) than that of ASL<sup>SufA6</sup> bound to CCC-U (gray).

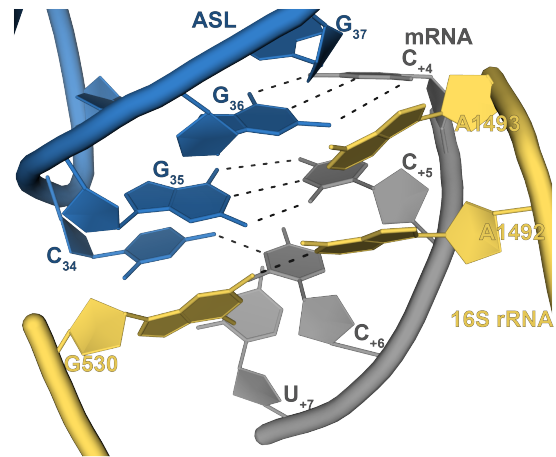

**Figure S4. The ASL<sup>SufA6</sup> A37.5 is accepted by the ribosome.**

16S rRNA nucleotides A1492 and A1493 flip from the internal helix 44 and G530 is positioned close to A1492 demonstrating recognition by the ribosome. Paromomycin was not added to the crystallization complex formation.

## REFERENCES

1. Jenner, L. B., Demeshkina, N., Yusupova, G., and Yusupov, M. (2010) Structural aspects of messenger RNA reading frame maintenance by the ribosome. *Nat Struct Mol Biol* **17**, 555-560
2. Maehigashi, T., Dunkle, J. A., Miles, S. J., and Dunham, C. M. (2014) Structural insights into +1 frameshifting promoted by expanded or modification-deficient anticodon stem loops. *Proc Natl Acad Sci U S A* **111**, 12740-12745
